# Supplementary material for: Formation of a caged rhodium complex via an intramolecular, metal-mediated [2 + 2 + 1] cycloaddition of alkynes and CO
Source: Royal Society of Chemistry journal article supplement (doi:10.1039/b202713e), 2002-01-01
Supplement: b202713e.pdf [file b202713e.pdf]

## Supplementary Information

### Spectroscopic Data for **10**

$^1\text{H}$  nmr (500.1 MHz,  $d_3$ -nitromethane):  $\delta$  1.37 (3 H, s, 3 x H051), 1.51 (1 H, m, H43b), 1.61 (3 H, s, 3 x H031), 1.77 (3 H, t,  $J_{\text{H13,H16}}$  2.5 Hz, 3 x H16) and (1 H, m, H42b), 1.88 (2 H, m, 2 x H13), 1.96-2.10 (1 H, m, H72b), 2.15-2.35 (7 H, m, 2 x H12, H42a, H43a, H72a and 2 x H73), 2.63 (1 H, broadened doublet, unassigned), 2.80-3.26 (16H, m, H11b, 2 x H41, TACN ring protons + 1 unassigned proton) and 3.74 (1 H, m, H11a).

$^{13}\text{C}$  nmr (125.8 MHz,  $d_3$ -nitromethane):  $\delta$  3.3 (C16), 7.6 (C051), 9.6 (C031), 16.5 (C43), 17.1 (C12), 21.9 (C73), 23.2 (C13), 28.5 (C72), 31.8 (C42), 51.4 (unassigned,  $\text{CH}_2$ ), 56.7 (unassigned,  $\text{CH}_2$ ), 58.8 (unassigned,  $\text{CH}_2$ ), 59.0 (unassigned,  $\text{CH}_2$ ), 59.4 (C11), 62.0 (C71), 64.5 (unassigned,  $\text{CH}_2$ ), 65.7 (C41), 73.3 (br m, C02), 74.5 (br d,  $J_{\text{Rh,C}}$  9 Hz, C05), 78.1 (C15), 79.1 (C14), 79.8 (br d,  $J_{\text{Rh,C}}$  12 Hz, C03), 101.4 (d,  $J_{\text{Rh,C}}$  8.9 Hz, C04) and 159.3 (C01).

Mass Spectrum (FAB):  $m/z$  500.2166 (M -  $\text{PF}_6$ ) (requires 500.2148).

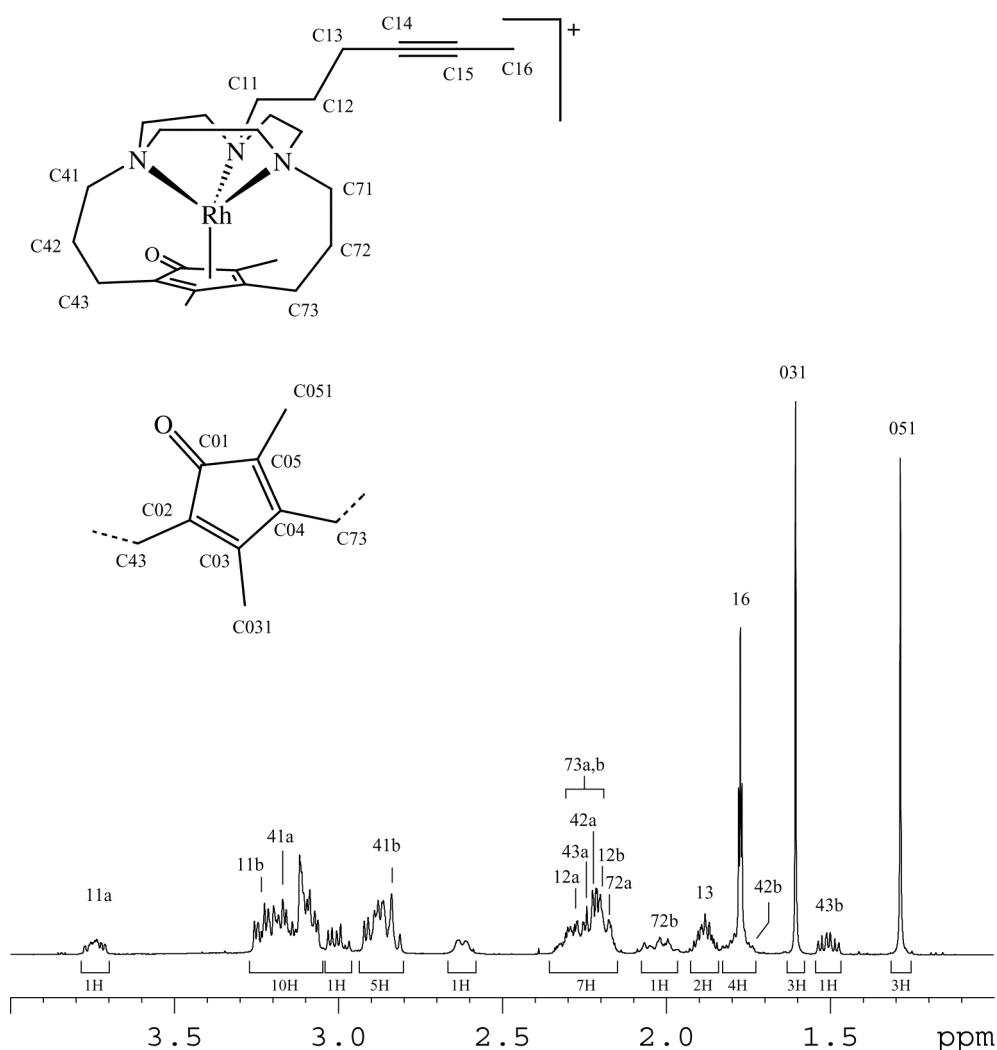

**Fig. S1**  $^1\text{H}$  NMR spectrum (500.1 MHz,  $\text{CD}_3\text{NO}_2$ ) of **10**
